# Supplementary material for: Polymerase-free measurement of microRNA-122 with single base specificity using single molecule arrays: Detection of drug-induced liver injury
Source: PubMed Central journal article supplement (PMC5497960; doi:10.1371/journal.pone.0179669), 2017-07-05
Supplement: pone.0179669.s001.pdf [file pone.0179669.s001.pdf]

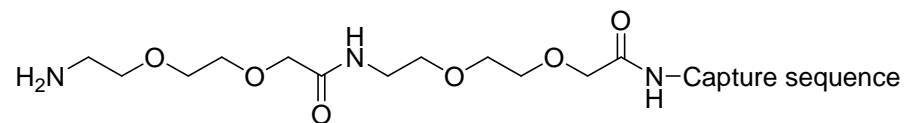

**S1 Figure.** Amino-PEG linker (“xx” in Table 1) located at the N-terminal end of the abasic PNA probe (**1**).
