# Supplementary material for: Polymerase-free measurement of microRNA-122 with single base specificity using single molecule arrays: Detection of drug-induced liver injury
Source: PubMed Central journal article supplement (PMC5497960; doi:10.1371/journal.pone.0179669), 2017-07-05
Supplement: pone.0179669.s005.pdf [file pone.0179669.s005.pdf]

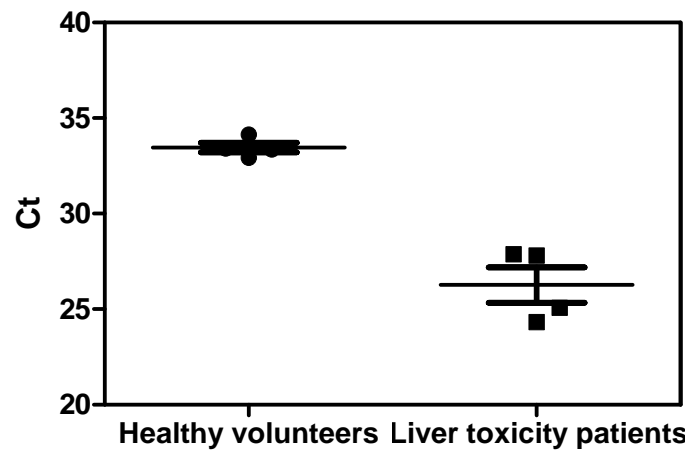

**S5 Figure.** Ct values for patients and healthy controls for the same samples measured using Simoa (Fig. 4A).
