# Supplementary material for: Polymerase-free measurement of microRNA-122 with single base specificity using single molecule arrays: Detection of drug-induced liver injury
Source: PubMed Central journal article supplement (PMC5497960; doi:10.1371/journal.pone.0179669), 2017-07-05
Supplement: pone.0179669.s006.pdf [file pone.0179669.s006.pdf]

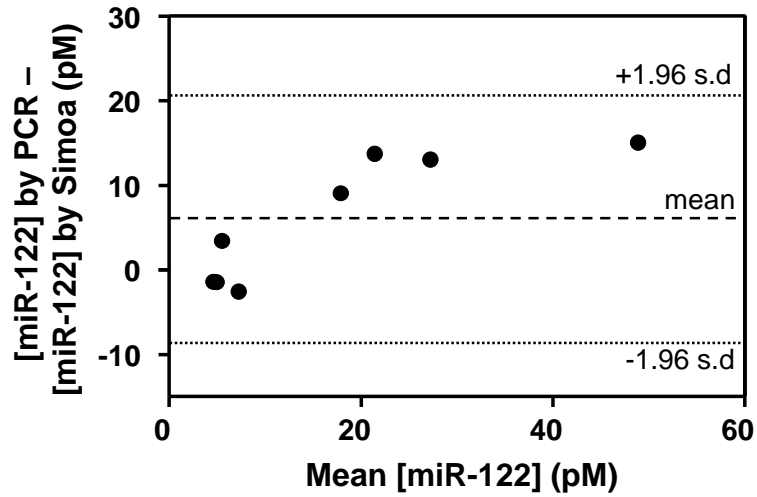

**S6 Figure.** Bland-Altman plot\* for concentrations of miR-122 in serum samples of patients determined using Simoa and PCR. The dashed line is at the mean of the difference in concentration between the methods; the dotted lines are at  $\pm 1.96$  s.d. of the mean.

\*Bland JM, Altman DG. Statistical methods for assessing agreement between two methods of clinical measurement. *Lancet*. 1986 Feb 8;1(8476):307-10.
