# Supplementary material for: Polymerase-free measurement of microRNA-122 with single base specificity using single molecule arrays: Detection of drug-induced liver injury
Source: PubMed Central journal article supplement (PMC5497960; doi:10.1371/journal.pone.0179669), 2017-07-05
Supplement: pone.0179669.s008.pdf [file pone.0179669.s008.pdf]

**S1 Table.** Demographics and clinical chemistry results for patients with liver injury.

| <b>Patient ID</b> | <b>Age (yrs)</b> | <b>Sex</b> | <b>ALT activity (U/L) (ULN 50)</b> | <b>INR</b> | <b>Serum Creatinine (<math>\mu\text{mol/L}</math>)</b> | <b>ALP activity (U/L)</b> | <b>Bilirubin (<math>\mu\text{mol/dL}</math>)</b> |
|-------------------|------------------|------------|------------------------------------|------------|--------------------------------------------------------|---------------------------|--------------------------------------------------|
| <b>3</b>          | 56               | M          | 2150                               | 1.3        | 56                                                     | 141                       | 23                                               |
| <b>4</b>          | 23               | F          | 487                                | 1.5        | 60                                                     | 64                        | 14                                               |
| <b>6</b>          | 46               | M          | 2963                               | 1.4        | 62                                                     | 139                       | 23                                               |
| <b>9</b>          | 63               | F          | 726                                | 1.2        | 68                                                     | 169                       | 14                                               |
