# Supplementary material for: Polymerase-free measurement of microRNA-122 with single base specificity using single molecule arrays: Detection of drug-induced liver injury
Source: PubMed Central journal article supplement (PMC5497960; doi:10.1371/journal.pone.0179669), 2017-07-05
Supplement: pone.0179669.s009.pdf [file pone.0179669.s009.pdf]

**S2 Table.** Sequences of nucleic acid molecules used to test the sensitivity and specificity of the Simoa assay.

| <b>ID</b> | <b>Name</b>                                  | <b>Sequence (5'-3')</b> |
|-----------|----------------------------------------------|-------------------------|
| <b>A</b>  | Calibrator for miR-122*                      | TGGAGTGTGACAATGGTGTTTG  |
| <b>B</b>  | Calibrator for single base mismatch miR-122* | TGGAGTGTTACAATGGTGTTTG  |
| <b>C</b>  | Off-target miR-39 <sup>†</sup>               | UCACCGGGUGUAAAUCAGCUUG  |

\* We used DNA analogs as calibrators for measuring miRNA in the clinical samples. DNA enabled long term storage of calibrators and more reliable determination of miR-122 concentration in samples. We have previously shown that uracil and thymidine have similar efficiencies for specifically templating the dynamic covalent chemical reaction between aldehyde-modified cytosine and secondary amine of the abasic PNA probe upon duplex formation.<sup>‡</sup> We have also shown equivalent performance of RNA and DNA calibrators for miR-122 in the assay presented here (data not shown).

<sup>†</sup>miRNeasy Serum/Plasma Spike-In Control (Cat No./ID:219610, Qiagen):10 pmol lyophilized *C.elegans* miR-39 miRNA mimic.

<sup>‡</sup>Bowler FR. Ph.D. Dissertation, University of Edinburgh, UK, 2011.
