# Supplementary material for: Polymerase-free measurement of microRNA-122 with single base specificity using single molecule arrays: Detection of drug-induced liver injury
Source: PubMed Central journal article supplement (PMC5497960; doi:10.1371/journal.pone.0179669), 2017-07-05
Supplement: pone.0179669.s010.pdf [file pone.0179669.s010.pdf]

**S3 Table.** Ct values determined using PCR as a function of the concentration of miR-122. The concentration is that of miR-122 in the reverse transcription (RT) reaction in the process for testing samples described in the Materials and Methods section. One RT reaction was carried out, and PCR performed on three aliquots from this reaction solution. n.d. = not determined.

| <b>Concentration<br/>(fM)</b> | <b>Ct values</b> |          |          | <b>Mean<br/>Ct</b> | <b>SD</b> | <b>CV</b> |
|-------------------------------|------------------|----------|----------|--------------------|-----------|-----------|
| <b>0</b>                      | 37.10841         | n.d.     | n.d.     | 37.108             | n.d       | n.d       |
| <b>0.1</b>                    | 35.75835         | n.d.     | n.d.     | 35.758             | n.d       | n.d       |
| <b>1</b>                      | 35.65074         | 36.61235 | 36.83607 | 36.366             | 0.630     | 1.7%      |
| <b>10</b>                     | 31.58425         | 31.55038 | 31.44276 | 31.526             | 0.074     | 0.2%      |
| <b>100</b>                    | 28.31135         | 27.97488 | 28.05834 | 28.115             | 0.175     | 0.6%      |
| <b>1,000</b>                  | 24.08295         | 24.15437 | 24.16391 | 24.134             | 0.044     | 0.2%      |
| <b>10,000</b>                 | 19.94744         | 19.8787  | 20.23545 | 20.021             | 0.189     | 0.9%      |
