# Supplementary material for: Polymerase-free measurement of microRNA-122 with single base specificity using single molecule arrays: Detection of drug-induced liver injury
Source: PubMed Central journal article supplement (PMC5497960; doi:10.1371/journal.pone.0179669), 2017-07-05
Supplement: pone.0179669.s011.pdf [file pone.0179669.s011.pdf]

**S4 Table.** AEB values for single base mismatch sequence (Molecule **B** in S2 Table) from 0 pM to 15  $\mu$ M. No increase in signal above background was observed across the concentration range.

| <b>Concentration of mismatched target (B)</b> | <b>Mean AEB</b> | <b>SD</b> | <b>CV</b> | <b>Signal-to-background ratio</b> |
|-----------------------------------------------|-----------------|-----------|-----------|-----------------------------------|
| 15 $\mu$ M                                    | 0.086           | 0.002     | 2%        | 0.92                              |
| 1.5 $\mu$ M                                   | 0.071           | 0.004     | 6%        | 0.76                              |
| 150 nM                                        | 0.079           | 0.016     | 20%       | 0.84                              |
| 15 nM                                         | 0.083           | 0.014     | 17%       | 0.89                              |
| 1.5 nM                                        | 0.091           | 0.009     | 10%       | 0.98                              |
| 150 pM                                        | 0.093           | 0.007     | 7%        | 1.00                              |
| 15 pM                                         | 0.089           | 0.004     | 4%        | 0.96                              |
| 0 pM<br>(background)                          | 0.093           | 0.009     | 9%        | 1.00                              |
