# Supplementary material for: Polymerase-free measurement of microRNA-122 with single base specificity using single molecule arrays: Detection of drug-induced liver injury
Source: PubMed Central journal article supplement (PMC5497960; doi:10.1371/journal.pone.0179669), 2017-07-05
Supplement: pone.0179669.s012.pdf [file pone.0179669.s012.pdf]

**S5 Table.** Concentration of miR-122 in clinical samples and serum control samples spiked with synthetic miR-122 determined using Simoa.

| Patient ID      | Sample number* | Sample volume (μL) | Concentration in 50 μL reaction (pM) | Recovery (%)† | Concentration in sample (pM) | Spiked concentration |
|-----------------|----------------|--------------------|--------------------------------------|---------------|------------------------------|----------------------|
| HV1             | 1              | 90                 | 1.51                                 | 51            | 2.65‡                        |                      |
|                 | 2              | 90                 | 3.91                                 | 81            | 4.27‡                        |                      |
| HV2             | 1              | 95                 | 1.51                                 | 84            | 1.51‡                        |                      |
|                 | 2              | 95                 | 3.81                                 | 94            | 3.41‡                        |                      |
| HV3             | 1              | 95                 | 1.34                                 | 83            | 1.37‡                        |                      |
|                 | 2              | 95                 | 2.95                                 | 84            | 2.97‡                        |                      |
| HV4             | 1              | 100                | 1.13                                 | 78            | 1.17‡                        |                      |
|                 | 2              | 100                | 3.32                                 | 70            | 3.81‡                        |                      |
| 3               | 1              | 105                | 2.85                                 | 41            | 5.28                         |                      |
|                 | 2              | 105                | 6.46                                 | 58            | 8.54                         |                      |
| 4               | 1              | 95                 | 11.57                                | 73            | 13.34                        |                      |
|                 | 2              | 95                 | 13.66                                | 79            | 14.56                        |                      |
| 6               | 1              | 95                 | 19.67                                | 80            | 20.71                        |                      |
|                 | 2              | 95                 | 31.43                                | 64            | 41.35                        |                      |
| 9               | 1              | 90                 | 3.21                                 | 75            | 3.81                         |                      |
|                 | 2              | 90                 | 6.25                                 | 98            | 5.67                         |                      |
| <b>Controls</b> |                |                    |                                      |               |                              |                      |
| 1               | 1              | 100                | n.d.                                 | 49            | n.d.                         | 10000                |
| 2               | 2              | 100                | n.d.                                 | 67            | n.d.                         | 10000                |
| 3               | 3              | 100                | 162.66                               | 56            | 232.13                       | 1000                 |
| 4               | 4              | 100                | 126.47                               | 43            | 233.96                       | 1000                 |
| 7               | 5              | 100                | 13.78                                | 45            | 24.31                        | 100                  |
| 8               | 6              | 100                | 3.69                                 | 44            | 6.70                         | 10                   |

n.d. = not determined

\*For each patient and healthy volunteer, miRNA was extracted from two samples and its concentration was determined.

† Recovery of miRNA from the sample was determined by PCR using miR-39 control spikes. The concentration in samples were corrected for this recovery.

‡ The AEB values determined for these samples were close together and slightly offset from the background AEB (Fig. 4A). This observation could be explained by a systematic difference in the background signal of the sample matrix compared to the calibration buffer, rather than by specific measurement of miR-122. Without further experimental confirmation, we regard these samples as not quantified for miR-122.
