# Supplementary material for: Polymerase-free measurement of microRNA-122 with single base specificity using single molecule arrays: Detection of drug-induced liver injury
Source: PubMed Central journal article supplement (PMC5497960; doi:10.1371/journal.pone.0179669), 2017-07-05
Supplement: pone.0179669.s013.pdf [file pone.0179669.s013.pdf]

**S6 Table.** Concentration of miR-122 in clinical samples and serum control samples spiked with synthetic miR-122 determined using PCR.

| Patient ID      | Sample number* | Volume sample (μL) | Ct   | Copies/μL in PCR reaction | Copies in sample  | Recovery (%) | Concentration in sample (pM) | Spiked concentration |
|-----------------|----------------|--------------------|------|---------------------------|-------------------|--------------|------------------------------|----------------------|
| <b>HV1</b>      | 1              | 90                 | 34.4 | 76                        | 3,345,710         | 51           | 0.12 <sup>‡</sup>            |                      |
|                 | 2              | 90                 | 34.1 | 92                        | 4,050,941         | 81           | 0.09 <sup>‡</sup>            |                      |
| <b>HV2</b>      | 1              | 95                 | 32.4 | 281                       | 12,355,108        | 84           | 0.26 <sup>‡</sup>            |                      |
|                 | 2              | 95                 | 32.9 | 200                       | 8,783,626         | 94           | 0.16 <sup>‡</sup>            |                      |
| <b>HV3</b>      | 1              | 95                 | 33.3 | 156                       | 6,875,551         | 83           | 0.15 <sup>‡</sup>            |                      |
|                 | 2              | 95                 | 33.4 | 147                       | 6,461,253         | 84           | 0.13 <sup>‡</sup>            |                      |
| <b>HV4</b>      | 1              | 100                | 33.2 | 169                       | 7,419,621         | 78           | 0.16 <sup>‡</sup>            |                      |
|                 | 2              | 100                | 33.4 | 152                       | 6,705,783         | 70           | 0.16 <sup>‡</sup>            |                      |
| <b>3</b>        | 1              | 105                | 29.1 | 2,295                     | 100,969,205       | 41           | 3.88                         |                      |
|                 | 2              | 105                | 27.9 | 4,942                     | 217,428,017       | 58           | 5.96                         |                      |
| <b>4</b>        | 1              | 95                 | 25.6 | 21,300                    | 937,196,939       | 73           | 22.41                        |                      |
|                 | 2              | 95                 | 25.1 | 29,113                    | 1,280,986,047     | 79           | 28.31                        |                      |
| <b>6</b>        | 1              | 95                 | 24.8 | 35,139                    | 1,546,107,754     | 80           | 33.74                        |                      |
|                 | 2              | 95                 | 24.3 | 47,006                    | 2,068,243,613     | 64           | 56.41                        |                      |
| <b>9</b>        | 1              | 90                 | 27.4 | 6,702                     | 294,868,894       | 75           | 7.24                         |                      |
|                 | 2              | 90                 | 27.8 | 5,120                     | 225,300,348       | 98           | 4.24                         |                      |
| <b>Controls</b> |                |                    |      |                           |                   |              |                              |                      |
| <b>1</b>        | 1              | 100                | 14.5 | 23,245,908                | 1,022,819,938,047 | 49           | 34380.66                     | 10000                |
| <b>2</b>        | 2              | 100                | 14.5 | 23,790,920                | 1,046,800,483,612 | 67           | 25999.14                     | 10000                |
| <b>3</b>        | 3              | 100                | 18.7 | 1,653,095                 | 72,736,170,424    | 56           | 2151.74                      | 1000                 |
| <b>4</b>        | 4              | 100                | 19.0 | 1,363,925                 | 60,012,704,821    | 43           | 2301.44                      | 1000                 |
| <b>7</b>        | 5              | 100                | 22.7 | 130,673                   | 5,749,590,955     | 45           | 210.31                       | 100                  |
| <b>8</b>        | 6              | 100                | 26.4 | 12,485                    | 549,318,183       | 44           | 20.67                        | 10                   |

\*For each patient and healthy volunteer, miRNA was extracted from two samples and its concentration was determined.

† Recovery of miRNA from the sample was determined by PCR using miR-39 control spikes. The concentration in samples were corrected for this recovery.

‡ The Ct values of samples from healthy volunteers were above or slightly below those of background samples (S3 Table), so the detection of miR-122 in these samples is ambiguous.
